# Supplementary material
Source: PubMed Central journal article supplement (PMC3993270)
Supplement: AAC.02551-13_zac005142855so1.pdf [file AAC.02551-13_zac005142855so1.pdf]

**Table S2. Stability (% difference) of analytes when compared with freshly prepared control samples. Assessments conducted at n=3 for each QC level and condition, means reported. F/T : Freeze-Thaw, ST: Short Term, PPS: Post Preparative Stability. Stock stability conducted at n=3 for each stock concentration (primary and LLOQ), mean deviation from control reported.**

| Condition | Analyte<br>QC Level | ATV    |      | DRV  |      | EFV  |      | LPV  |      | RTV  |      |
|-----------|---------------------|--------|------|------|------|------|------|------|------|------|------|
|           |                     | Low    | High | Low  | High | Low  | High | Low  | High | Low  | High |
| F/T       |                     | 0.3    | 3.2  | 3.2  | 5.0  | -4.8 | 1.6  | -1.3 | -3.2 | -3.0 | 2.4  |
| ST        |                     | 4.0    | -5.5 | -5.5 | -4.1 | -7.2 | 0.5  | 0.6  | -1.7 | -4.7 | 0.2  |
| PPS       |                     | 0.2    | 2.4  | 6.6  | -0.2 | -5.0 | 0.8  | 5.3  | 1.1  | -2.9 | -1.2 |
|           |                     | Stocks |      |      |      |      |      |      |      |      |      |
| Primary   |                     |        | 3.8  |      | -1.3 |      | 1.3  |      | -4.6 |      | -8.2 |
| LLOQ      |                     |        | 0.0  |      | -3.5 |      | 4.0  |      | 6.3  |      | 0.0  |

**Table S3. Matrix effect and recovery for each analyte ran in 5 different lots of lysed PBMC matrix at low, medium and high QC levels. Matrix effect %: (Post extraction spiked sample / Neat sample) x 100, Recovery %: (Extracted Sample / Post-Extraction Spiked Sample) x 100, Process Efficiency %: (Extracted Sample / Neat Sample) x 100.**

| Analyte Level        | ATV  |      |      | DRV  |      |      | EFV  |      |      | LPV  |      |      | RTV  |      | ATV-IS | EFV-IS | RTV-IS |      |
|----------------------|------|------|------|------|------|------|------|------|------|------|------|------|------|------|--------|--------|--------|------|
|                      | Low  | Med  | High   |        |        |      |
| Matrix effect %      | 107  | 105  | 108  | 104  | 109  | 110  | 113  | 112  | 106  | 108  | 110  | 106  | 109  | 114  | 101    | 113    | 109    |      |
| Recovery %           | 72.5 | 72.0 | 71.5 | 80.7 | 69.7 | 72.1 | 74.4 | 68.3 | 70.1 | 75.8 | 70.9 | 70.9 | 77.0 | 68.6 | 68.8   | 73.1   | 71.0   | 71.1 |
| Process efficiency % | 77.3 | 77.5 | 77.4 | 83.8 | 76.1 | 79.1 | 83.5 | 77.4 | 78.4 | 79.7 | 76.9 | 77.6 | 81.3 | 74.7 | 78.1   | 78.1   | 80.2   | 77.2 |
